# Supplementary material
Source: publisher site journal article supplement (https://www.dovepress.com/article/121723)
Supplement: Supplementary file 1 [file get_supplementary_file.php]

Supplementary Table 1. List of Independent Ethics Committees for NCT01462929

**Independent Ethics Committees**

| Country               | Investigator Name | Investigator number | Name and Address of Central IEC                                                                                                                                                                                                                                                          | Name and Address of Local IEC |
|-----------------------|-------------------|---------------------|------------------------------------------------------------------------------------------------------------------------------------------------------------------------------------------------------------------------------------------------------------------------------------------|-------------------------------|
| <b>Czech Republic</b> |                   |                     |                                                                                                                                                                                                                                                                                          |                               |
|                       |                   |                     | <p>Eticka komise pro<br/>Multicentricke klinicke<br/>hodnoceni<br/>Fakultni nemocnice v Motole<br/>V Uvalu 84<br/>150 06 Praha 5 – Motol</p> <p>Chairperson:<br/>MUDr. Vratislav Smelhaus</p>                                                                                            | Not applicable                |
|                       |                   |                     | <p>Members:<br/>Doc.MUDr. Jan Zuna, Ph.D.<br/>Mgr. Vlastimil Holicek<br/>Professor MUDr. Vaclav<br/>Chaloupecky, CSc.<br/>Doc.MUDr. Jiri Charvat, CSs.<br/>Doc.MUDr. Jiri Dusek, CSc.<br/>MUDr. Zdenek Linke<br/>Doc.MUDr. Jitka Zelenkova,<br/>CSc.<br/>Ing. Jana Hrdlickova, Ph.D.</p> |                               |
|                       |                   |                     | <p>JUDr. Radka Medkova<br/>Ivan Kazimour<br/>Professor MUDr. Lidka Lisa,<br/>DrSc.<br/>Anna Dobesova<br/>PharmDr. Peter Horak<br/>Doc. MUDr. Jakub Hort, Ph.D.<br/>JUDr. Katerina Kralovcova<br/>Professor MUDr. Michal<br/>Hrdlicka, CSc.</p>                                           |                               |

| Country        | Investigator Name | Investigator number | Name and Address of Central IEC                                                                                                                                                                                                                                                                                                                                       | Name and Address of Local IEC                                                                                                                     |
|----------------|-------------------|---------------------|-----------------------------------------------------------------------------------------------------------------------------------------------------------------------------------------------------------------------------------------------------------------------------------------------------------------------------------------------------------------------|---------------------------------------------------------------------------------------------------------------------------------------------------|
| <b>Germany</b> |                   |                     |                                                                                                                                                                                                                                                                                                                                                                       |                                                                                                                                                   |
|                |                   |                     |                                                                                                                                                                                                                                                                                                                                                                       | Ethikkommission der Landesärztekammer Hessen<br>Im Vogelsgesang 3<br>60488 Frankfurt am Main<br><br>Chairperson: Professor Dr. S. Harder          |
|                |                   |                     | Ethikkommission der Landesärztekammer Hessen<br>Im Vogelsgesang 3<br>60488 Frankfurt am Main<br><br>Chairperson: Professor Dr. S. Harder<br><br>Members:<br>Professor Dr. Sebastian Harder<br>Dr. Jochen Graff<br>Dr. Achim Schmidtke<br>Professor Dr. Hansjürgen Bratzke<br>Professor Dr. Reinhard Dettmeyer<br>Dr. Thomas Konrad<br>Professor Dr. Rupert Bauersachs | Ethikkommission des Landes Berlin,<br>Landesamt für Gesundheit und Soziales<br>Fehrbelliner Platz 1<br>10707 Berlin<br><br>Chairperson: Dr. Fülle |
|                |                   |                     | Professor Dr. Werner Mondorf<br>Dr. med. Christian Menzel<br>Professor Dr. Bernhard Bauer<br><br>Additional Members:<br>Dr. Horst Baas<br>Professor Dr. Rudolf Janzen<br>Dr. Annkatrin Helberg-Lubinski                                                                                                                                                               | Ethikkommission der Landesärztekammer Brandenburg<br>Dreifertsraße 12; 03044 Cottbus<br><br>Chairperson: Professor Dr. M. Matthias                |
|                |                   |                     | Dr. Thomas Heinz<br>Professor Dr. Hannsjörg Wilhelm Seyberth<br>Professor Dr. Werner Rettwitz-Volk<br>Dr. Lothar Schrod<br>Professor Dr. Elke Jäger<br>Dr. Sibylle Loibl<br>Dr. Michael Weber                                                                                                                                                                         | Ethikkommission des Landes Berlin,<br>Landesamt für Gesundheit und Soziales<br>Fehrbelliner Platz 1<br>10707 Berlin<br><br>Chairperson: Dr. Fülle |
|                |                   |                     | Professor Dr. Jan Goßmann                                                                                                                                                                                                                                                                                                                                             | Ethikkommission der Ärztekammer Nordrhein<br>Tersteegenstraße 9<br>40474 Düsseldorf<br><br>Chairperson: Professor Dr. U. Sehr-Ricken              |

| Country        | Investigator Name | Investigator number | Name and Address of Central IEC                                                                                                                                                                              | Name and Address of Local IEC                                                                                                                             |
|----------------|-------------------|---------------------|--------------------------------------------------------------------------------------------------------------------------------------------------------------------------------------------------------------|-----------------------------------------------------------------------------------------------------------------------------------------------------------|
| <b>Germany</b> |                   |                     |                                                                                                                                                                                                              |                                                                                                                                                           |
|                |                   |                     |                                                                                                                                                                                                              | Ethikkommission des Landes Berlin,<br>Landesamt für Gesundheit und Soziales<br>Fehrbelliner Platz 1<br>10707 Berlin<br><br>Chairperson: Dr. Fülle         |
|                |                   |                     | Ethikkommission der Landesärztekammer Hessen<br>Im Vogelsgesang 3<br>60488 Frankfurt am Main                                                                                                                 | Ethikkommission der Landesärztekammer Hessen<br>Im Vogelsgesang 3<br>60488 Frankfurt am Main<br><br>Chairperson: Professor Dr. S. Harder                  |
|                |                   |                     | Chairperson: Professor Dr. S. Harder<br><br>Members:<br>Professor Dr. Sebastian Harder<br>Dr. Jochen Graff<br>Dr. Achim Schmidtke<br>Professor Dr. Hansjürgen Bratzke                                        | Ethikkommission der Ärztekammer Hamburg<br>Humboldtstr. 67a<br>22083 Hamburg<br><br>Chairperson: Professor Dr. T. Weber                                   |
|                |                   |                     | Professor Dr. Reinhard Dettmeyer<br>Dr. Thomas Konrad<br>Professor Dr. Rupert Bauersachs<br>Professor Dr. Werner Mondorf<br>Dr. med. Christian Menzel<br>Professor Dr. Bernhard Bauer                        | Ethikkommission des Landes Berlin,<br>Landesamt für Gesundheit und Soziales<br>Fehrbelliner Platz 1<br>10707 Berlin<br><br>Chairperson: Dr. Fülle         |
|                |                   |                     | Additional Members:<br>Dr. Horst Baas<br>Professor Dr. Rudolf Janzen<br>Dr. Annkatrin Helberg-Lubinski<br>Dr. Thomas Heinz<br>Professor Dr. Hannsjörg Wilhelm Seyberth<br>Professor Dr. Werner Rettwitz-Volk | Ethikkommission der Friedrich-Schiller-Universität Jena<br>Bachstraße 18<br>07740 Jena<br><br>Chairperson: Professor Dr. D. Barz                          |
|                |                   |                     | Dr. Lothar Schrod<br>Professor Dr. Elke Jäger<br>Dr. Sibylle Loibl<br>Dr. Michael Weber<br>Professor Dr. Jan Goßmann                                                                                         | Ethikkommission an der Medizinischen Fakultät der Universität Rostock<br>St.-Georg-Str. 108<br>18055 Rostock<br><br>Chairperson: Professor Dr. A. Büttner |

| Country        | Investigator Name | Investigator number | Name and Address of Central IEC                                                                                                                                                                         | Name and Address of Local IEC                                                                                                                                                        |
|----------------|-------------------|---------------------|---------------------------------------------------------------------------------------------------------------------------------------------------------------------------------------------------------|--------------------------------------------------------------------------------------------------------------------------------------------------------------------------------------|
| <b>Germany</b> |                   |                     |                                                                                                                                                                                                         |                                                                                                                                                                                      |
|                |                   |                     | Ethikkommission der Landesärztekammer Hessen<br>Im Vogelsgesang 3<br>60488 Frankfurt am Main                                                                                                            | Ethikkommission zur Beurteilung medizinischer Forschung am Menschen der Ärztekammer Niedersachsen<br>Berliner Allee 20<br>30175 Hannover<br><br>Chairperson: Professor Dr. P. Kleine |
|                |                   |                     | Chairperson: Professor Dr. S. Harder<br><br>Members:<br>Professor Dr. Sebastian Harder                                                                                                                  | Ethikkommission der Ärztekammer Schleswig-Holstein<br>Bismarckallee 8-12<br>23795 Bad Segeberg<br><br>Chairperson: Professor Dr. G. Hintze                                           |
|                |                   |                     | Dr. Jochen Graff<br>Dr. Achim Schmidtko<br>Professor Dr. Hansjürgen Bratzke<br>Professor Dr. Reinhard Dettmeyer<br>Dr. Thomas Konrad<br>Professor Dr. Rupert Bauersachs                                 | Ethikkommission bei der Sächsischen Landesärztekammer<br>Schützenhöhe 16<br>01099 Dresden<br><br>Chairperson: Professor Dr. R. Haupt                                                 |
|                |                   |                     | Professor Dr. Werner Mondorf<br>Dr. med. Christian Menzel<br>Professor Dr. Bernhard Bauer<br><br>Additional Members:<br>Dr. Horst Baas<br>Professor Dr. Rudolf Janzen<br>Dr. Annkatrin Helberg-Lubinski | Ethikkommission der Ärztekammer Schleswig-Holstein<br>Bismarckallee 8-12<br>23795 Bad Segeberg<br><br>Chairperson: Professor Dr. G. Hintze                                           |
|                |                   |                     | Dr. Thomas Heinz<br>Professor Dr. Hannsjörg Wilhelm Seyberth<br>Professor Dr. Werner Rettwitz-Volk<br>Dr. Lothar Schrod<br>Professor Dr. Elke Jäger<br>Dr. Sibylle Loibl<br>Dr. Michael Weber           | Ethikkommission der Medizinischen Hochschule Hannover<br>Carl-Neuberg-Str. 1<br>30625 Hannover<br><br>Chairperson: Professor Dr. H. D. Träger                                        |
|                |                   |                     | Professor Dr. Jan Goßmann                                                                                                                                                                               | Ethikkommission der Ärztekammer Hamburg<br>Humboldtstr. 67a<br>22083 Hamburg<br><br>Chairperson: Professor Dr. T. Weber                                                              |

| Country        | Investigator Name | Investigator number | Name and Address of Central IEC | Name and Address of Local IEC                                                                                                                     |
|----------------|-------------------|---------------------|---------------------------------|---------------------------------------------------------------------------------------------------------------------------------------------------|
| <b>Germany</b> |                   |                     |                                 |                                                                                                                                                   |
|                |                   |                     |                                 | Ethikkommission des Landes Berlin,<br>Landesamt für Gesundheit und Soziales<br>Fehrbelliner Platz 1<br>10707 Berlin<br><br>Chairperson: Dr. Fülle |
|                |                   |                     |                                 | Ethikkommission des Landes Berlin,<br>Landesamt für Gesundheit und Soziales<br>Fehrbelliner Platz 1<br>10707 Berlin<br><br>Chairperson: Dr. Fülle |

| Country        | Investigator Name | Investigator number | Name and Address of Central IEC                                                                                                                                                                                                                                                                                                                                                                                                                                                                                                                                                                                                                                                                                                                                                                                                                                                                         | Name and Address of Local IEC |
|----------------|-------------------|---------------------|---------------------------------------------------------------------------------------------------------------------------------------------------------------------------------------------------------------------------------------------------------------------------------------------------------------------------------------------------------------------------------------------------------------------------------------------------------------------------------------------------------------------------------------------------------------------------------------------------------------------------------------------------------------------------------------------------------------------------------------------------------------------------------------------------------------------------------------------------------------------------------------------------------|-------------------------------|
| <b>Hungary</b> |                   |                     |                                                                                                                                                                                                                                                                                                                                                                                                                                                                                                                                                                                                                                                                                                                                                                                                                                                                                                         |                               |
|                |                   |                     | <p>Egészségügyi Tudományos Tanács<br/> Klinikai Farmakológiai Etikai Bizottsága<br/> H-1051 Budapest, Arany János u. 6-8.<br/> Medical Research Council<br/> Ethics Committee for Clinical Pharmacology 1051 Budapest<br/> Arany János u 6-8</p>                                                                                                                                                                                                                                                                                                                                                                                                                                                                                                                                                                                                                                                        | Not applicable                |
|                |                   |                     | <p>Chairperson: Dr. Fürst Zsuzsanna</p> <p>Members:<br/> Klara Baltasi<br/> Professor Dr. Istvan Bitter<br/> Professor Dr. Gyorgy Blasko<br/> Dr Imre Bodo<br/> Professor Dr. Janos Borvendeg<br/> Dr Istvan Dobo<br/> Dr Laszlo Egri<br/> Professor Dr. Csaba Farsang<br/> Professor Dr. Tamas Fenyvesi<br/> Professor Dr. Kalman Gyurkovits<br/> Professor Dr. Bela Hunyady<br/> Professor Dr. Janos Hunyadi<br/> Professor Dr. Janos Julesz<br/> Dr. Andras Kadar<br/> Professor Dr. Robert Karpati<br/> Dr. Robert Kiss<br/> Dr. Tamas Masszi<br/> Professor Dr. Bela Meleg<br/> Dr. Maria Orodan<br/> Dr. Robert Poka<br/> Professor Dr. Gyula Poór<br/> Professor Dr. György Reusz<br/> Dr. Andras Rosta<br/> Professor. Dr. Geza Sas<br/> Istvanne Solyom<br/> Dr. Andras Szalka<br/> Professor Dr. Janos Szanto<br/> Dr Judit Tarnai<br/> Dr. Vasvary Arturne<br/> Professor Dr. Erno Bacsy</p> |                               |
|                |                   |                     |                                                                                                                                                                                                                                                                                                                                                                                                                                                                                                                                                                                                                                                                                                                                                                                                                                                                                                         |                               |
|                |                   |                     |                                                                                                                                                                                                                                                                                                                                                                                                                                                                                                                                                                                                                                                                                                                                                                                                                                                                                                         |                               |
|                |                   |                     |                                                                                                                                                                                                                                                                                                                                                                                                                                                                                                                                                                                                                                                                                                                                                                                                                                                                                                         |                               |

| Country       | Investigator Name | Investigator number | Name and Address of Central IEC                                                                                                                                                                                                                                                                                                                                                                                                                                                                                                            | Name and Address of Local IEC |
|---------------|-------------------|---------------------|--------------------------------------------------------------------------------------------------------------------------------------------------------------------------------------------------------------------------------------------------------------------------------------------------------------------------------------------------------------------------------------------------------------------------------------------------------------------------------------------------------------------------------------------|-------------------------------|
| <b>Poland</b> |                   |                     |                                                                                                                                                                                                                                                                                                                                                                                                                                                                                                                                            |                               |
|               |                   |                     | <p>Komisja Bioetyczna przy<br/>Instytucie Gruźlicy i Chorób<br/>Płuc<br/>ul. Płocka 26<br/>01-138 Warszawa</p> <p>Chairperson:<br/>Professor Jan Kuś</p> <p>Members:<br/>Professor Danuta<br/>Chmielewska-Szewczyk<br/>Professor Ewa Rowińska-<br/>Zakrzewska<br/>Professor Zofia Zwolska<br/>Professor Jan Zieliński<br/>Professor Adam Torbicki<br/>Henryk Mazurek M.D., Ph.D<br/>Paweł Kołb M.D., Ph.D.<br/>Jerzy Walczak M.D. Ph.D.<br/>Assistant Professor Stefan<br/>Wesołowski<br/>Władysława Wójcik MSc<br/>Maciej Arkuszyński</p> | Not applicable                |
|               |                   |                     |                                                                                                                                                                                                                                                                                                                                                                                                                                                                                                                                            |                               |
|               |                   |                     |                                                                                                                                                                                                                                                                                                                                                                                                                                                                                                                                            |                               |
|               |                   |                     |                                                                                                                                                                                                                                                                                                                                                                                                                                                                                                                                            |                               |
|               |                   |                     |                                                                                                                                                                                                                                                                                                                                                                                                                                                                                                                                            |                               |
|               |                   |                     |                                                                                                                                                                                                                                                                                                                                                                                                                                                                                                                                            |                               |
|               |                   |                     |                                                                                                                                                                                                                                                                                                                                                                                                                                                                                                                                            |                               |
|               |                   |                     |                                                                                                                                                                                                                                                                                                                                                                                                                                                                                                                                            |                               |
|               |                   |                     |                                                                                                                                                                                                                                                                                                                                                                                                                                                                                                                                            |                               |
|               |                   |                     |                                                                                                                                                                                                                                                                                                                                                                                                                                                                                                                                            |                               |
|               |                   |                     |                                                                                                                                                                                                                                                                                                                                                                                                                                                                                                                                            |                               |
|               |                   |                     |                                                                                                                                                                                                                                                                                                                                                                                                                                                                                                                                            |                               |
|               |                   |                     |                                                                                                                                                                                                                                                                                                                                                                                                                                                                                                                                            |                               |
